# Supplementary material for: Differential Gene Expression in the EphA4 Knockout Spinal Cord and Analysis of the Inflammatory Response Following Spinal Cord Injury
Source: PubMed Central journal article supplement (PMC3358264; doi:10.1371/journal.pone.0037635), 2012-05-22
Supplement: pone.0037635.s002.pdf [file pone.0037635.s002.pdf]

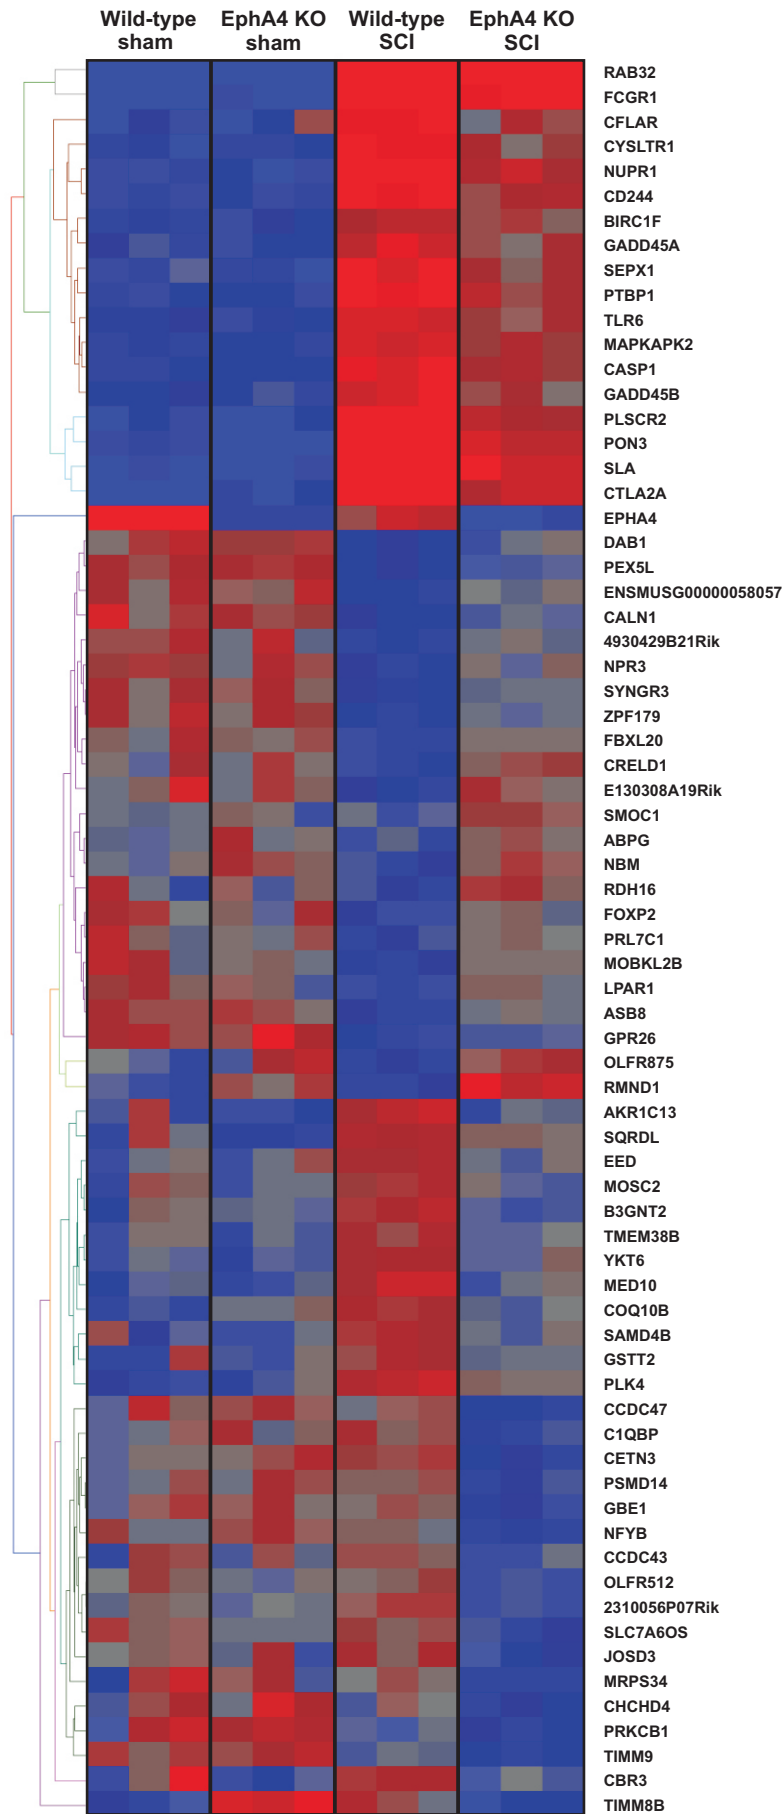

Low  High  
*Relative expression of a gene between groups*
